# Supplementary material for: Photoelectrochemical properties of p-type CuBi2O4 prepared by spray pyrolysis of carbon-free precursor aqueous solution combined with post-annealing treatment
Source: Royal Society of Chemistry journal article supplement (doi:10.1039/d3nj04878k), 2023-11-22
Supplement: d3nj04878k1.pdf [file d3nj04878k1.pdf]

## Electronic Supporting Information (ESI)

### **Photoelectrochemical properties of p-type $\text{CuBi}_2\text{O}_4$ prepared by spray pyrolysis of carbon-free precursor aqueous solution combined with post-annealing treatment**

*Kaisei Wakishima,<sup>a</sup> Tomohiro Higashi,<sup>\*b</sup> Akira Nagaoka,<sup>a,c</sup> and Kenji Yoshino<sup>\*a</sup>*

<sup>a</sup> K. Wakishima, A. Nagaoka, and K. Yoshino, Electrical and Electronic Engineering Program, Faculty of Engineering, University of Miyazaki, 1-1 Gakuen-kibanadai-nishi, Miyazaki 889-2192, Japan.

<sup>b</sup> T. Higashi, Institute for Tenure Track Promotion, University of Miyazaki, 1-1 Gakuen-kibanadai-nishi, Miyazaki 889-2192, Japan.

<sup>c</sup> A. Nagaoka, Research Center for Sustainable Energy & Environmental Engineering, University of Miyazaki, 1-1 Gakuen-kibanadai-nishi, Miyazaki 889-2192, Japan.

\*E-mails: [t\\_higashi@cc.miyazaki-u.ac.jp](mailto:t_higashi@cc.miyazaki-u.ac.jp) , [t0b114u@cc.miyazaki-u.ac.jp](mailto:t0b114u@cc.miyazaki-u.ac.jp)

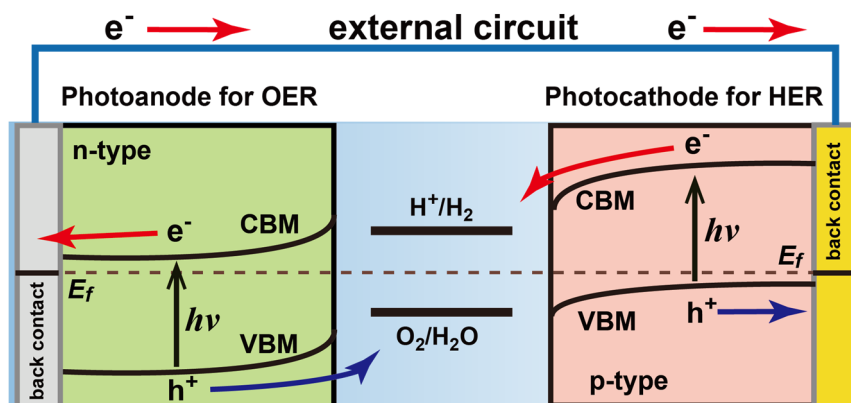

Figure S1. Schematic depiction of overall water splitting by the PEC cell comprising of the photocathode for HER and the photoanode for OER.

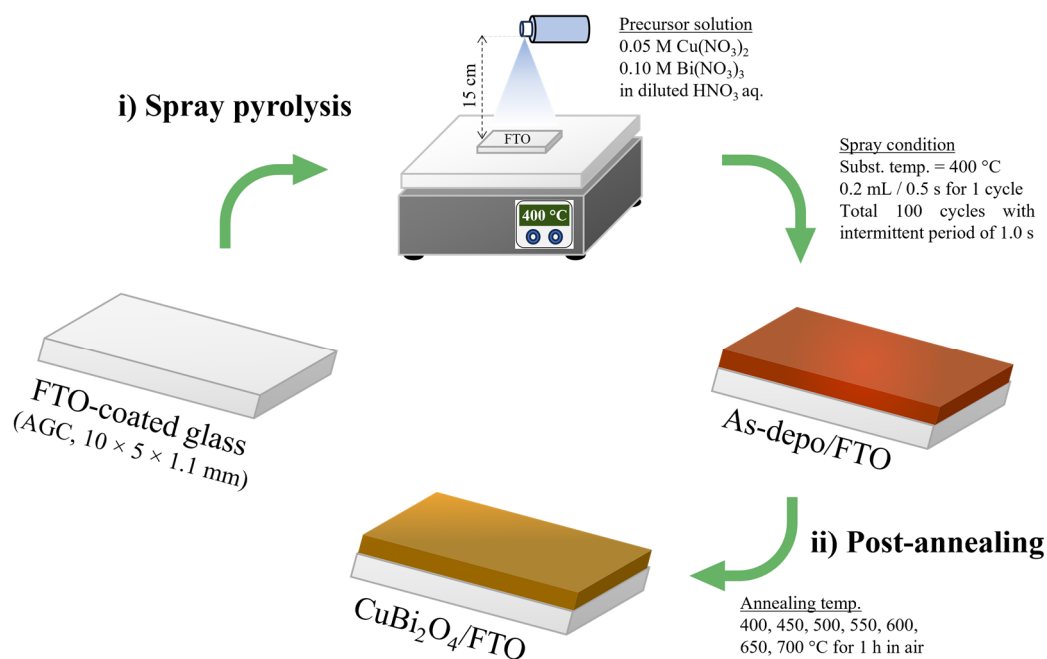

Figure S2. Fabrication process of  $\text{CuBi}_2\text{O}_4$  thin film on FTO substrate.

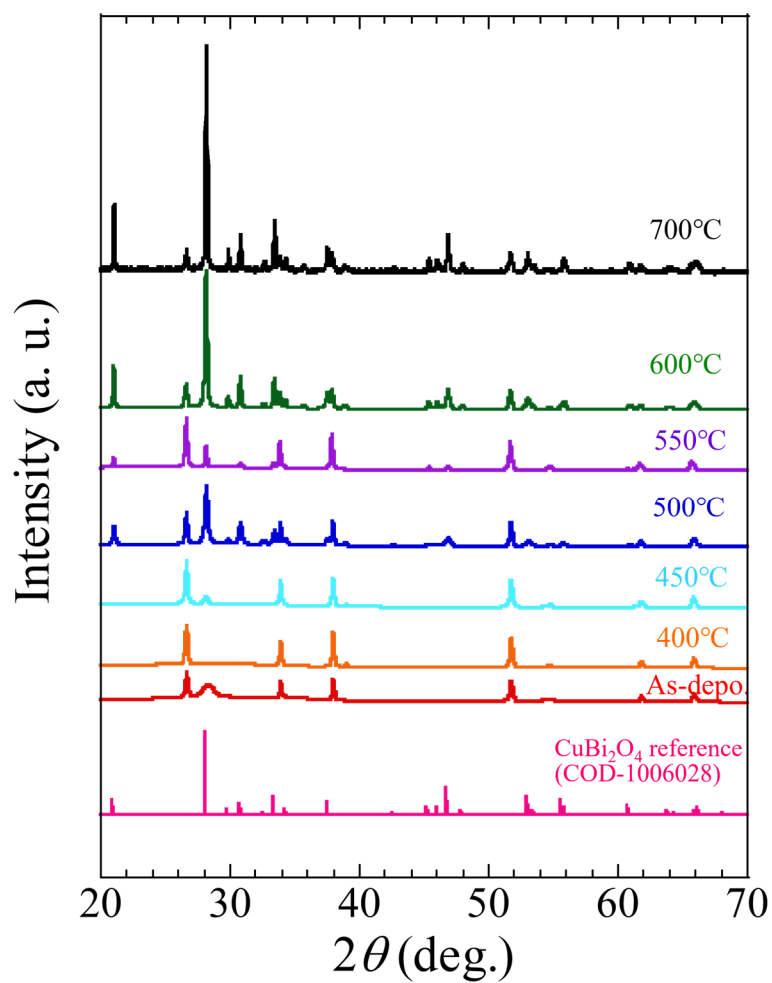

Figure S3. X-ray diffraction (XRD) patterns of the samples prepared through a spray pyrolysis (As-depo) and post-annealing treatment with different annealing temperatures of 400, 450, 500, 550, 600, and 700 °C for 1 h in air.

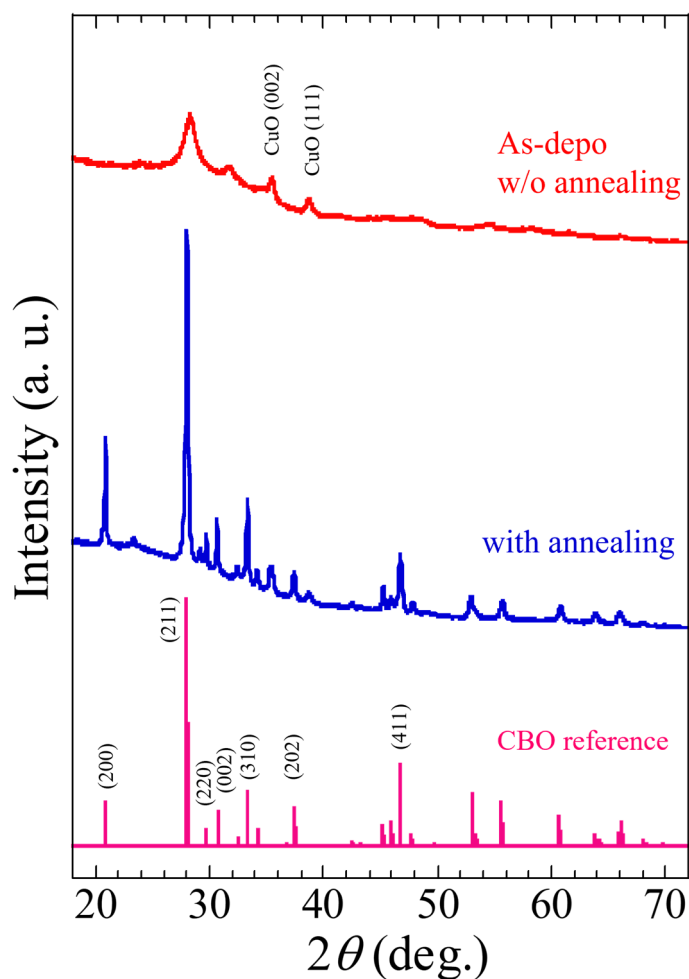

Figure S4. XRD patterns of the samples prepared on soda lime glass substrate (without an insertion of FTO layer) through a spray pyrolysis (As-depo) and post-annealing treatment at 600 °C for 1 h in air.

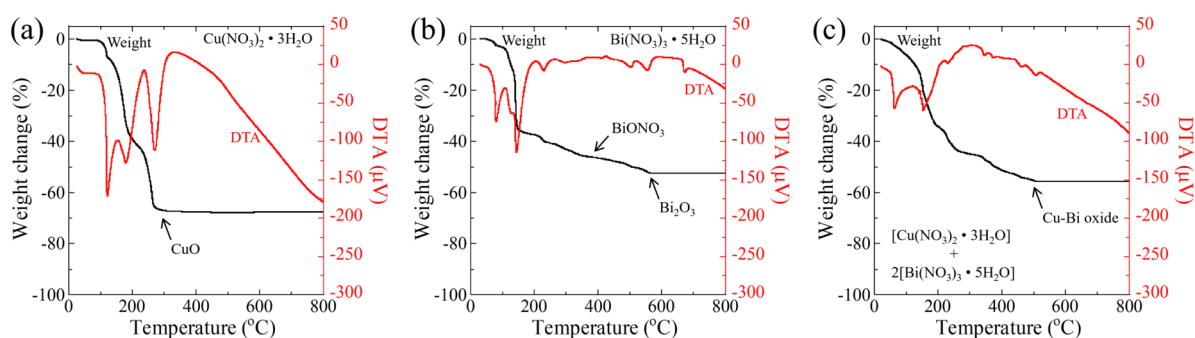

Figure S5. Thermogravimetry-differential thermal analysis (TG-DTA) data of (a)  $\text{Cu}(\text{NO}_3)_2 \cdot 3\text{H}_2\text{O}$ , (b)  $\text{Bi}(\text{NO}_3)_3 \cdot 5\text{H}_2\text{O}$ , (c) mixed powder of  $\text{Cu}(\text{NO}_3)_2 \cdot 3\text{H}_2\text{O}$  and  $\text{Bi}(\text{NO}_3)_3 \cdot 5\text{H}_2\text{O}$  with  $\text{Cu} : \text{Bi} = 1 : 2$ .

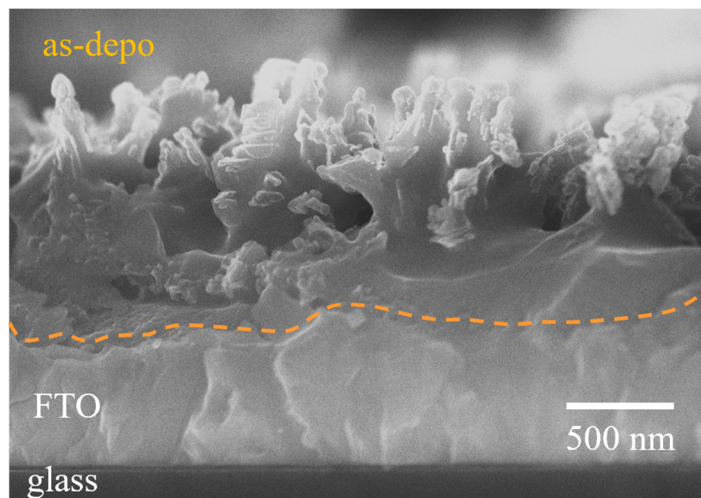

Figure S6. Cross-sectional SEM image for as-deposited film on FTO substrate.

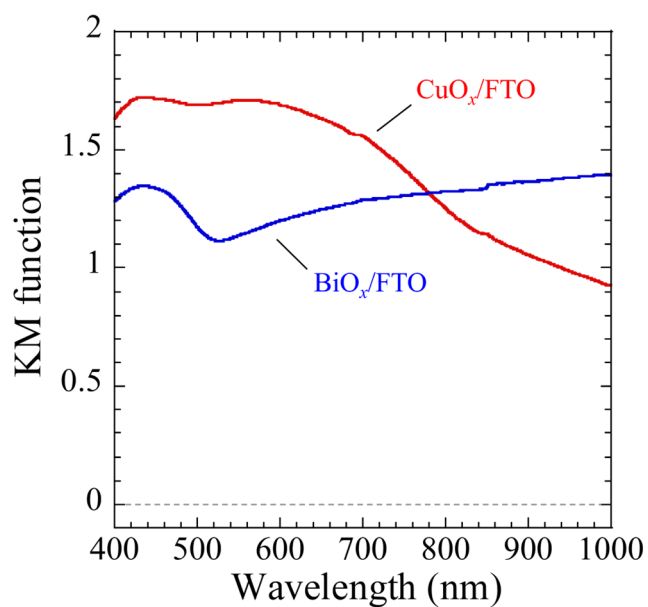

Figure S7. Diffuse reflectance spectra (DRS) of Cu-oxide ( $\text{CuO}_x$ ) and Bi-oxide ( $\text{BiO}_x$ ) prepared on FTO substrate through spray pyrolysis methods using the 0.05 M  $\text{Cu}(\text{NO}_3)_2$  and 0.10 M  $\text{Bi}(\text{NO}_3)_3$  dissolved in diluted nitric acid-based aqueous solutions. In the spray pyrolysis, the FTO substrate temperature was kept at 400 °C.

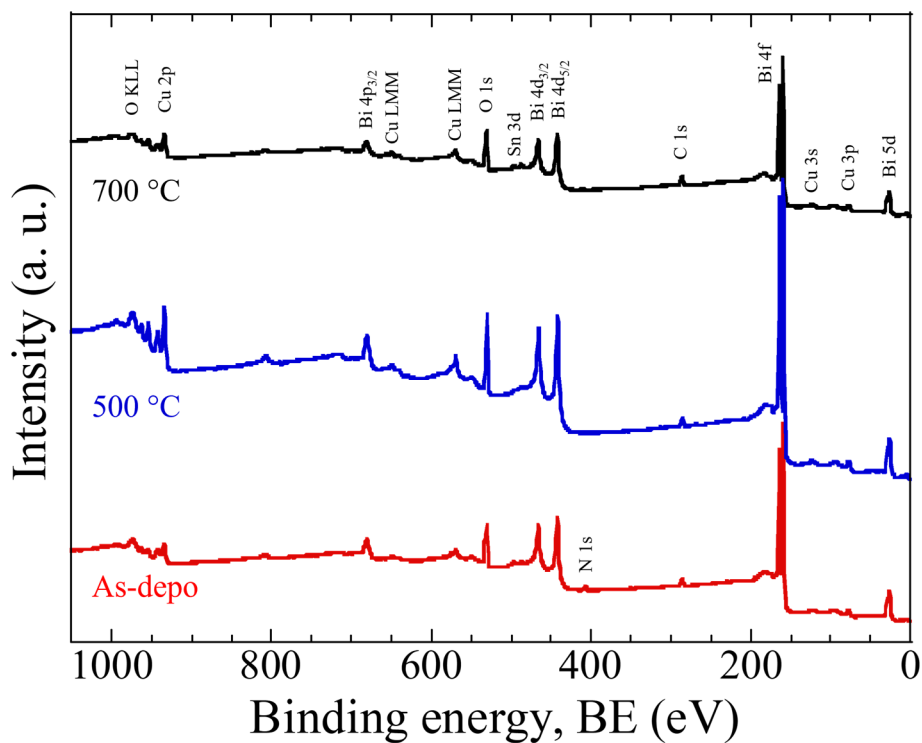

Figure S8. X-ray photoelectron spectroscopy (XPS) overall spectra (wide-scan XPS) of an as-deposited film on FTO (red), the samples processed by the post-annealing treatment at the temperature of 500 °C (blue) and 700 °C (black).

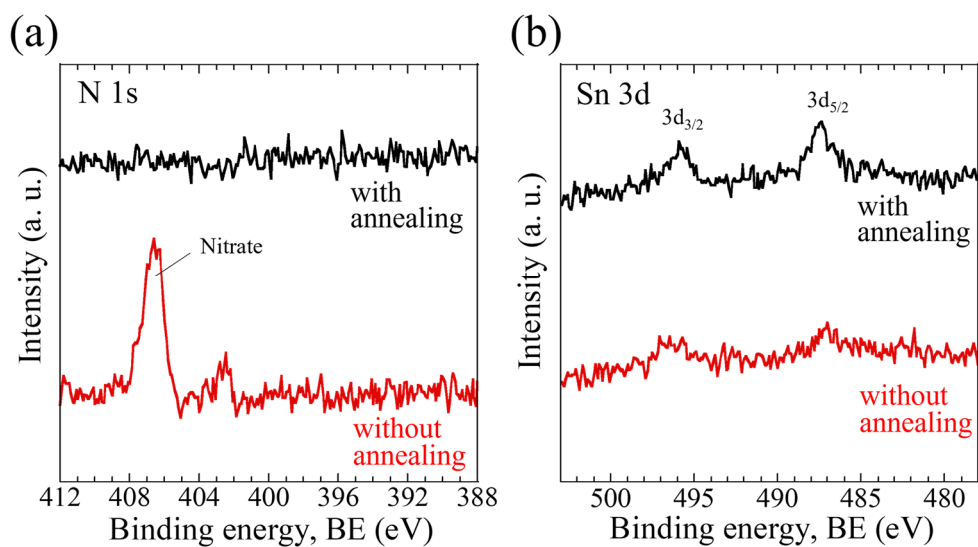

Figure S9. High-resolution XPS spectra of N 1s (a) and Sn 3d (b) for CBO samples with (colored in black) and without (colored in red) post-annealing treatment at 500 °C for 1h.

Table S1. Fitting parameters for HR-XPS Cu 2p spectra of CBO sample with a post-annealing treatment at 700 °C for 1 h in air

|                  | Binding energy, BE (eV) |                      | Full-width half maximum (eV) |                      |
|------------------|-------------------------|----------------------|------------------------------|----------------------|
|                  | Cu 2p <sub>3/2</sub>    | Cu 2p <sub>1/2</sub> | Cu 2p <sub>3/2</sub>         | Cu 2p <sub>1/2</sub> |
| Cu <sup>2+</sup> | 934.0                   | 953.8                | 2.30                         | 2.30                 |
| Reduced-Cu       | 932.4                   | 952.2                | 1.10                         | 1.10                 |

Table S2. Surface concentration ratio of Cu<sup>2+</sup> and Bi<sup>3+</sup> from the HR-XPS spectra\*

| Annealing temp. | [Cu / (Cu + Bi)] | [Bi / (Cu + Bi)] | Cu <sup>2+</sup> : Bi <sup>3+</sup> ** |
|-----------------|------------------|------------------|----------------------------------------|
| w/o annealing   | 13.5 %           | 86.5 %           | 1.0 : 6.4                              |
| 500 °C          | 19.2 %           | 80.8 %           | 1.0 : 4.2                              |
| 700 °C          | 20.2 %           | 79.8 %           | 1.0 : 4.0                              |

\* Surface atomic concentration ratio of Cu and Bi of CBO samples was calculated using the results of HR-XPS peak fitting for the Cu 2p (Cu<sup>2+</sup> peaked at 934.0 and 953.8 eV) and the Bi 4f (Bi<sup>3+</sup> peaked at 158.8 and 164.1 eV) as shown in Figures 3a for Cu 2p and 3b for Bi 4f.

\*\* Concentration ratio of Cu<sup>2+</sup> and Bi<sup>3+</sup> (Cu<sup>2+</sup> : Bi<sup>3+</sup>) was calculated using the ratio of [Cu / (Cu + Bi)] and [Bi / (Cu + Bi)] when we assumed the atomic concentrations of Cu and Bi are equivalent to the Cu<sup>2+</sup> and Bi<sup>3+</sup>, respectively.

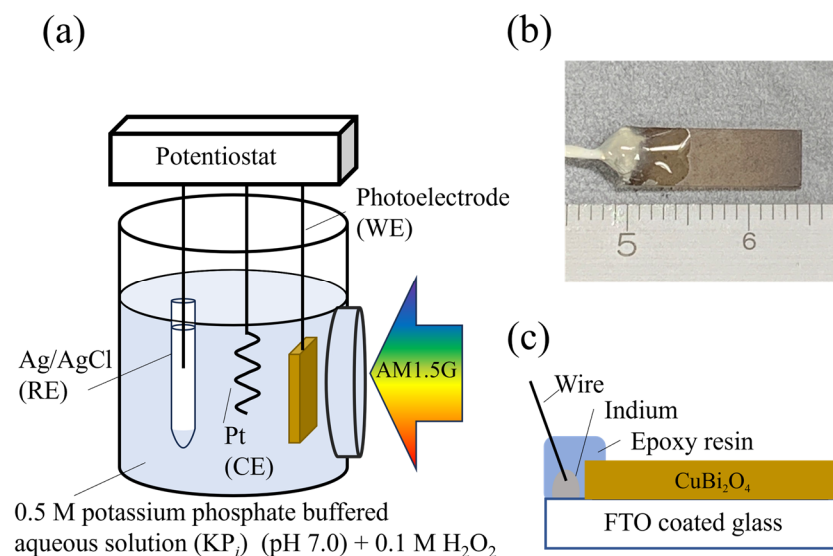

Figure S10. (a) Experimental set-up in a three-electrode configuration for the photoelectrochemical (PEC) measurements. (b, c) photograph and schematic of CBO-based photoelectrodes.

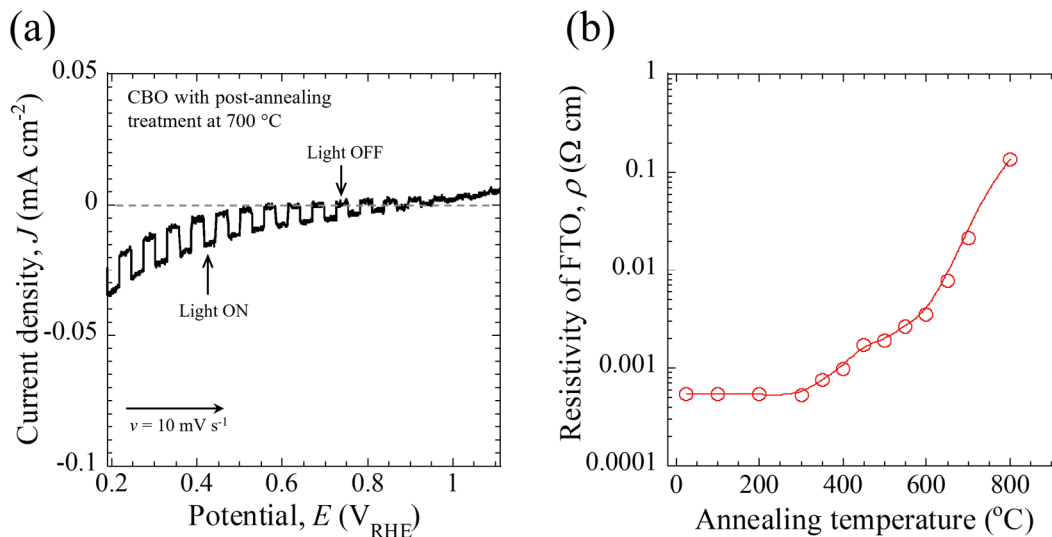

Figure S11. (a) Photocurrent density vs. photoelectrode potential ( $J$ - $E$ ) curve for the CBO-based photoelectrode processed with the post-annealing treatment at 700 °C for 1 h in air. The data was acquired in the 0.5 M  $KP_i$  buffered aqueous solution with 0.1 M  $H_2O_2$  sacrificial reagent (pH = 7.0) under chopped AM 1.5G solar illumination with a potential sweep rate ( $v$ ) of 10  $mV s^{-1}$ . (b) Plot of resistivity ( $r$ ) of bare FTO substrate as a function of annealing temperature in air for 1 h.



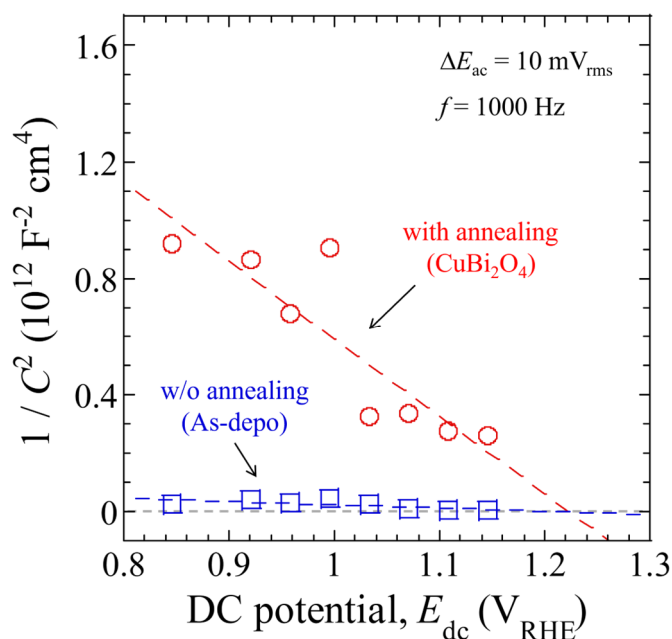

Figure S12. Mott-Schottky (MS) plot for CBO-based photoelectrodes with (circle) and without (square) post-annealing treatment. The data was acquired in a 0.5 M  $\text{KPi}$  buffered aqueous solution ( $\text{pH} = 7.0$ ) in the dark condition. The CBO sample was annealed at a temperature of  $600 \text{ }^\circ\text{C}$  for 1 h. The AC amplitude ( $\Delta E_{\text{ac}}$ ) and the frequency of potential modulation ( $f$ ) were  $10 \text{ mV}_{\text{rms}}$  and  $1000 \text{ Hz}$ , respectively. The geometrical electrode area ( $A$ ) of both photoelectrodes is  $0.40 \text{ cm}^2$ . The dashed lines indicate the fitting of the MS plot in the potential range from  $0.85 \text{ V}_{\text{RHE}}$  to  $1.15 \text{ V}_{\text{RHE}}$ . From the interception of the line with the  $x$ -axis (DC potential,  $E_{\text{dc}}$ ), the flatband potential ( $E_{\text{FB}}$ ) of CBO-based photoelectrode was calculated to be  $1.20 \text{ V}_{\text{RHE}}$ .

Table S3. PEC properties of CBO photoelectrodes processed by post-annealing treatment.

| Annealing<br>temperature<br>(°C) | $E_{\text{on}}$ (V <sub>RHE</sub> )* |                                    | $J$ at 0.6 V <sub>RHE</sub> (mA cm <sup>-2</sup> ) |                                    |
|----------------------------------|--------------------------------------|------------------------------------|----------------------------------------------------|------------------------------------|
|                                  | w/o H <sub>2</sub> O <sub>2</sub>    | with H <sub>2</sub> O <sub>2</sub> | w/o H <sub>2</sub> O <sub>2</sub>                  | with H <sub>2</sub> O <sub>2</sub> |
| w/o annealing                    | 0.64                                 | 0.86                               | -0.06                                              | -0.34                              |
| 400                              | 0.64                                 | 0.92                               | -0.07                                              | -0.44                              |
| 450                              | 0.65                                 | 0.96                               | -0.09                                              | -0.57                              |
| 500                              | 0.74                                 | 1.04                               | -0.16                                              | -0.92                              |
| 550                              | 0.74                                 | 1.04                               | -0.19                                              | -0.94                              |
| 600                              | 0.76                                 | 1.06                               | -0.20                                              | -0.94                              |
| 650                              | 0.73                                 | 0.97                               | -0.16                                              | -0.58                              |
| 700                              | -                                    | -                                  | -                                                  | -0.01                              |

\*Onset potential ( $E_{\text{on}}$ ) was defined as the photoelectrode potential (V<sub>RHE</sub>) required to generate a photocurrent density ( $J$ ) of -0.05 mA cm<sup>-2</sup>.

Table S4. Summary for the recently reported CuBi<sub>2</sub>O<sub>4</sub> photocathodes prepared by wet processes.

|                       | Preparation method                      | Electrolyte for PEC test                                                 | Photocurrent density, $J$                                 | Ref. |
|-----------------------|-----------------------------------------|--------------------------------------------------------------------------|-----------------------------------------------------------|------|
| Pt/CBO                | Drop-casting                            | 0.3 M K <sub>2</sub> SO <sub>4</sub><br>(pH = 6.8)                       | -0.15 mA cm <sup>-2</sup><br>at 0 V <sub>NHE</sub>        | [1]  |
| Pt/CBO/CuO            | Drop-casting                            | 0.3 M K <sub>2</sub> SO <sub>4</sub><br>(pH = 6.8)                       | -0.7 mA cm <sup>-2</sup><br>at 0 V <sub>NHE</sub>         | [1]  |
| CBO/FTO               | Cathodically electrochemical deposition | 0.1 M K <sub>2</sub> SO <sub>4</sub><br>(pH = 6.8)                       | -0.23 mA cm <sup>-2</sup><br>at 0.1 V <sub>RHE</sub>      | [2]  |
| Pt/CBO                | Electrodeposition                       | 0.1 M NaOH<br>(pH 12.8) saturated with O <sub>2</sub>                    | -0.8 mA cm <sup>-2</sup><br>at 0.6 V <sub>RHE</sub>       | [3]  |
| Pt/Ag-CBO             | Electrodeposition                       | 0.1 M NaOH<br>(pH 12.8) saturated with O <sub>2</sub>                    | -1.0 mA cm <sup>-2</sup><br>at 0.6 V <sub>RHE</sub>       | [3]  |
| Pt/CBO                | Drop-casting                            | 0.3 M K <sub>2</sub> SO <sub>4</sub> + 0.2 M<br>phosphate buffer         | -0.5 mA cm <sup>-2</sup><br>at 0.4 V <sub>RHE</sub>       | [4]  |
| CBO                   | Electrochemical Synthesis               | 0.1 M K <sub>2</sub> SO <sub>4</sub><br>(pH = 10.8)                      | -0.07 mA cm <sup>-2</sup><br>at 0.6 V <sub>RHE</sub>      | [5]  |
| CBO                   | Electrodeposition                       | 0.1 M K <sub>2</sub> SO <sub>4</sub><br>(pH = 6.8)                       | -0.03 mA cm <sup>-2</sup><br>at -0.4 V <sub>Ag/AgCl</sub> | [6]  |
| CBO/CuO               | Electrodeposition                       | 0.5 M Na <sub>2</sub> SO <sub>4</sub>                                    | -0.9 mA cm <sup>-2</sup><br>at 0.1 V <sub>RHE</sub>       | [7]  |
| Pt/CBO/FTO            | Thermal oxidation                       | 0.3 M K <sub>2</sub> SO <sub>4</sub> /0.2 M<br>phosphate buffer solution | -0.41 mA cm <sup>-2</sup><br>at 0.3 V <sub>RHE</sub>      | [8]  |
| CBO                   | Drop-casting                            | 0.1M Na <sub>2</sub> SO <sub>4</sub>                                     | -1.2 mA cm <sup>-2</sup><br>at 0.15 V <sub>RHE</sub>      | [9]  |
| CBO@MoS <sub>2</sub>  | Drop-casting                            | 0.1 M NaOH                                                               | -0.182 mA cm <sup>-2</sup><br>at 0.6 V <sub>RHE</sub>     | [10] |
| Pt/CBO                | nanofiber fabrication process           | 0.1 M potassium borate<br>(KB <sub>i</sub> ) buffer                      | -0.21 mA.cm <sup>-2</sup><br>at 0.6 V <sub>RHE</sub>      | [11] |
| CBO                   | Drop-casting                            | 0.1M Na <sub>2</sub> SO <sub>4</sub>                                     | -3.0 mA cm <sup>-2</sup><br>at 0 V <sub>RHE</sub>         | [12] |
| TiO <sub>2</sub> /CBO | Electrodeposition                       | 0.1 M NaOH                                                               | -0.35 mA cm <sup>-2</sup><br>at 0.60 V <sub>RHE</sub>     | [13] |
| Textured-CBO          | Vacuum Drop-casting                     | 1 M NaOH<br>(pH 13.6)                                                    | -1.77 mA cm <sup>-2</sup><br>at 0.4 V <sub>RHE</sub>      | [14] |

|              |                 |                                                                                                                   |                                                      |           |
|--------------|-----------------|-------------------------------------------------------------------------------------------------------------------|------------------------------------------------------|-----------|
| CBO          | Spray pyrolysis | 0.3 M K <sub>2</sub> SO <sub>4</sub> + 0.2 M KP <sub>i</sub><br>with H <sub>2</sub> O <sub>2</sub><br>(pH = 6.65) | -2.0 mA cm <sup>-2</sup><br>at 0.6 V <sub>RHE</sub>  | [15,16]   |
| Gradient-CBO | Spray pyrolysis | 0.3 M K <sub>2</sub> SO <sub>4</sub> + 0.2 M KP <sub>i</sub><br>with H <sub>2</sub> O <sub>2</sub><br>(pH = 6.65) | -2.5 mA cm <sup>-2</sup><br>at 0.6 V <sub>RHE</sub>  | [16,17]   |
| STSA-CBO     | Spray pyrolysis | 0.3 M K <sub>2</sub> SO <sub>4</sub> + 0.2 M KP <sub>i</sub><br>with H <sub>2</sub> O <sub>2</sub><br>(pH = 6.65) | -1.20 mA cm <sup>-2</sup><br>at 0.6 V <sub>RHE</sub> | [19]      |
| Co-doped CBO | Spray pyrolysis | 0.5 M Na <sub>2</sub> SO <sub>4</sub><br>(pH = 7.2)                                                               | -1.6 mA cm <sup>-2</sup><br>at 0.0 V <sub>RHE</sub>  | [20]      |
| CBO          | Spray pyrolysis | 0.5 M KP <sub>i</sub><br>(pH = 7.0)                                                                               | -0.20 mA cm <sup>-2</sup><br>at 0.6 V <sub>RHE</sub> | This work |
| CBO          | Spray pyrolysis | 0.5 M KP <sub>i</sub><br>with H <sub>2</sub> O <sub>2</sub><br>(pH = 7.0)                                         | -0.95 mA cm <sup>-2</sup><br>at 0.6 V <sub>RHE</sub> | This work |

Table S5. Fabrication conditions of CBO/FTO photoelectrodes prepared by spray pyrolysis and thermal annealing and their PEC characteristics under AM1.5G solar illumination.

|                                                            | Solvent and Additives             | Substrate temp. | Post-anneal temp. | Electrolyte for PEC test                                                                                          | Photocurrent density, <i>J</i>                          | Ref.     |
|------------------------------------------------------------|-----------------------------------|-----------------|-------------------|-------------------------------------------------------------------------------------------------------------------|---------------------------------------------------------|----------|
| CBO                                                        | Acetic acid/ethanol, PEG and TEOF | 450 °C          | –                 | 0.3 M K <sub>2</sub> SO <sub>4</sub> + 0.2 M KP <sub>i</sub><br>(pH = 6.65)                                       | -0.3 mA cm <sup>-2</sup><br>at 0.6 V <sub>RHE</sub>     | [15]     |
| CBO                                                        | Acetic acid/ethanol, PEG and TEOF | 450 °C          | –                 | 0.3 M K <sub>2</sub> SO <sub>4</sub> + 0.2 M KP <sub>i</sub><br>with H <sub>2</sub> O <sub>2</sub><br>(pH = 6.65) | -2.0 mA cm <sup>-2</sup><br>at 0.6 V <sub>RHE</sub>     | [15,16]  |
| Gradient CBO                                               | Acetic acid/ethanol, PEG and TEOF | 450 °C          | –                 | 0.3 M K <sub>2</sub> SO <sub>4</sub> + 0.2 M KP <sub>i</sub><br>with H <sub>2</sub> O <sub>2</sub><br>(pH = 6.65) | -2.5 mA cm <sup>-2</sup><br>at 0.6 V <sub>RHE</sub>     | [16, 17] |
| Pt/TiO <sub>2</sub> /CdS/CBO                               | Acetic acid/ethanol, PEG and TEOF | 450 °C          | –                 | 0.3 M K <sub>2</sub> SO <sub>4</sub> + 0.2 M KP <sub>i</sub><br>(pH = 6.65)                                       | -1.0 mA cm <sup>-2</sup><br>at 0.0 V <sub>RHE</sub>     | [16]     |
| RuO <sub>x</sub> /TiO <sub>2</sub> /CdS/CBO                | Acetic acid/ethanol, PEG and TEOF | 450 °C          | –                 | 0.3 M K <sub>2</sub> SO <sub>4</sub> + 0.2 M KP <sub>i</sub><br>(pH = 6.8)                                        | -0.22 mA cm <sup>-2</sup><br>at 0.6 V <sub>RHE</sub> *  | [17]     |
| RuO <sub>x</sub> /TiO <sub>2</sub> /CdS/CBO                | Acetic acid/ethanol, PEG and TEOF | 450 °C          | –                 | 0.3 M K <sub>2</sub> SO <sub>4</sub> + 0.2 M KP <sub>i</sub><br>(pH = 6.65)                                       | -0.33 mA cm <sup>-2</sup><br>at 0.6 V <sub>RHE</sub> ** | [18]     |
| RuO <sub>x</sub> /TiO <sub>2</sub> /BiVO <sub>4</sub> /CBO | Acetic acid/ethanol, PEG and TEOF | 450 °C          | –                 | 0.3 M K <sub>2</sub> SO <sub>4</sub> + 0.2 M KP <sub>i</sub><br>(pH = 6.65)                                       | -0.08 mA cm <sup>-2</sup><br>at 0.6 V <sub>RHE</sub> ** | [18]     |

|                  |                                     |        |                   |                                                                                                             |                                                      |                  |
|------------------|-------------------------------------|--------|-------------------|-------------------------------------------------------------------------------------------------------------|------------------------------------------------------|------------------|
| DA-CBO           | Glacial acetic acid/ethanol         | 250 °C | 550 °C            | 0.3 M K <sub>2</sub> SO <sub>4</sub> + 0.2 M KP <sub>i</sub> (pH = 6.65)                                    | –                                                    | [19]             |
| DA-CBO           | Glacial acetic acid/ethanol         | 250 °C | 550 °C            | 0.3 M K <sub>2</sub> SO <sub>4</sub> + 0.2 M KP <sub>i</sub> with H <sub>2</sub> O <sub>2</sub> (pH = 6.65) | –0.13 mA cm <sup>-2</sup> at 0.6 V <sub>RHE</sub> ** | [19]             |
| TSA-CBO          | Glacial acetic acid/ethanol         | 250 °C | 550 °C            | 0.3 M K <sub>2</sub> SO <sub>4</sub> + 0.2 M KP <sub>i</sub> (pH = 6.65)                                    | –0.05 mA cm <sup>-2</sup> at 0.6 V <sub>RHE</sub> ** | [19]             |
| TSA-CBO          | Glacial acetic acid/ethanol         | 250 °C | 550 °C            | 0.3 M K <sub>2</sub> SO <sub>4</sub> + 0.2 M KP <sub>i</sub> with H <sub>2</sub> O <sub>2</sub> (pH = 6.65) | –0.50 mA cm <sup>-2</sup> at 0.6 V <sub>RHE</sub> ** | [19]             |
| STSA-CBO         | Glacial acetic acid/ethanol         | 250 °C | 250 °C and 550 °C | 0.3 M K <sub>2</sub> SO <sub>4</sub> + 0.2 M KP <sub>i</sub> (pH = 6.65)                                    | –0.13 mA cm <sup>-2</sup> at 0.6 V <sub>RHE</sub> ** | [19]             |
| STSA-CBO         | Glacial acetic acid/ethanol         | 250 °C | 250 °C and 550 °C | 0.3 M K <sub>2</sub> SO <sub>4</sub> + 0.2 M KP <sub>i</sub> with H <sub>2</sub> O <sub>2</sub> (pH = 6.65) | –1.20 mA cm <sup>-2</sup> at 0.6 V <sub>RHE</sub> ** | [19]             |
| Pt/ZnO /STSA-CBO | Glacial acetic acid/ethanol         | 250 °C | 250 °C and 550 °C | 0.3 M K <sub>2</sub> SO <sub>4</sub> + 0.2 M KP <sub>i</sub> (pH = 6.65)                                    | –0.46 mA cm <sup>-2</sup> at 0.4 V <sub>RHE</sub>    | [19]             |
| CBO              | Glacial acetic acid/deionized water | 300 °C | 500 °C            | 0.5 M Na <sub>2</sub> SO <sub>4</sub> (pH = 7.2)                                                            | –0.6 mA cm <sup>-2</sup> at 0.0 V <sub>RHE</sub> *** | [20]             |
| Co-doped CBO     | Glacial acetic acid/deionized water | 300 °C | 500 °C            | 0.5 M Na <sub>2</sub> SO <sub>4</sub> (pH = 7.2)                                                            | –1.6 mA cm <sup>-2</sup> at 0.0 V <sub>RHE</sub> *** | [20]             |
| CBO              | Diluted nitric acid/deionized water | 400 °C | 600 °C            | 0.5 M KP <sub>i</sub> (pH = 7.0)                                                                            | –0.20 mA cm <sup>-2</sup> at 0.6 V <sub>RHE</sub>    | <b>This work</b> |
| CBO              | Diluted nitric acid/deionized water | 400 °C | 600 °C            | 0.5 M KP <sub>i</sub> with H <sub>2</sub> O <sub>2</sub> (pH = 7.0)                                         | –0.94 mA cm <sup>-2</sup> at 0.6 V <sub>RHE</sub>    | <b>This work</b> |

\* *J* value was estimated from the IPCE spectrum.

\*\* *J* value was estimated from the literature's linear sweep voltammograms (*J*-*E* curve).

\*\*\* The light source was a 300 W Xe lamp (100 mW cm<sup>-2</sup>, λ > 380 nm).

We note that the mixing ratio of acetic acid to ethanol in references [15] through [20] is 1:9 (v/v), while the ratio of acetic acid to deionized water in reference [19] is 1:4 (v/v). Cu(NO<sub>3</sub>)<sub>2</sub> and Bi(NO<sub>3</sub>)<sub>3</sub> were dissolved into the acetic acid/ethanol solvent in references [15-19], while reference [20] used Cu(CH<sub>3</sub>COO)<sub>2</sub> and Bi(NO<sub>3</sub>)<sub>3</sub> for the starting material. A 1 vol% polyethylene glycol (PEG) and a 5 vol% trimethyl orthoformate (TEOF) were added to the acetic acid/ethanol (1:9 v/v) solvent (in references [15-18]).

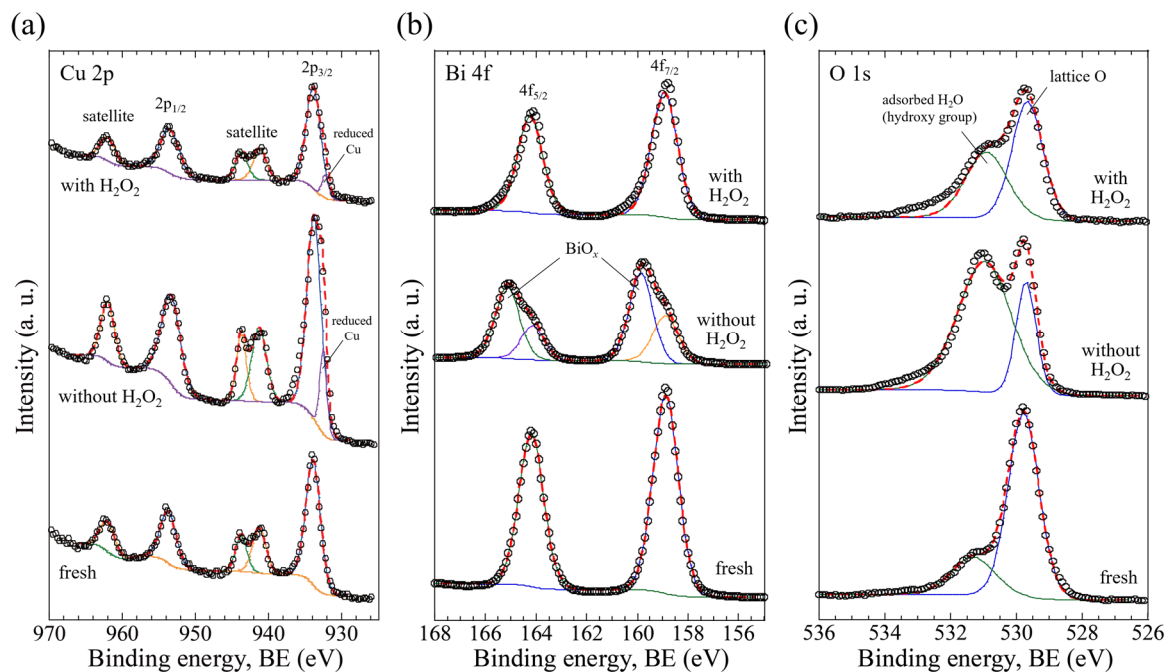

Figure S13. HR-XPS data for the CBO photoelectrodes before and after the PEC stability test at 0.6 V<sub>RHE</sub> under simulated AM 1.5G solar illumination in the electrolyte contained with and without H<sub>2</sub>O<sub>2</sub> sacrificial reagent. (a) Cu 2p, (b) Bi 4f, and (c) O 1s. Empty circles, solid lines (blue, green, orange, and purple), and dashed lines (red) indicate experimental data, fitted curves, and composite curves used in peak fitting, respectively.

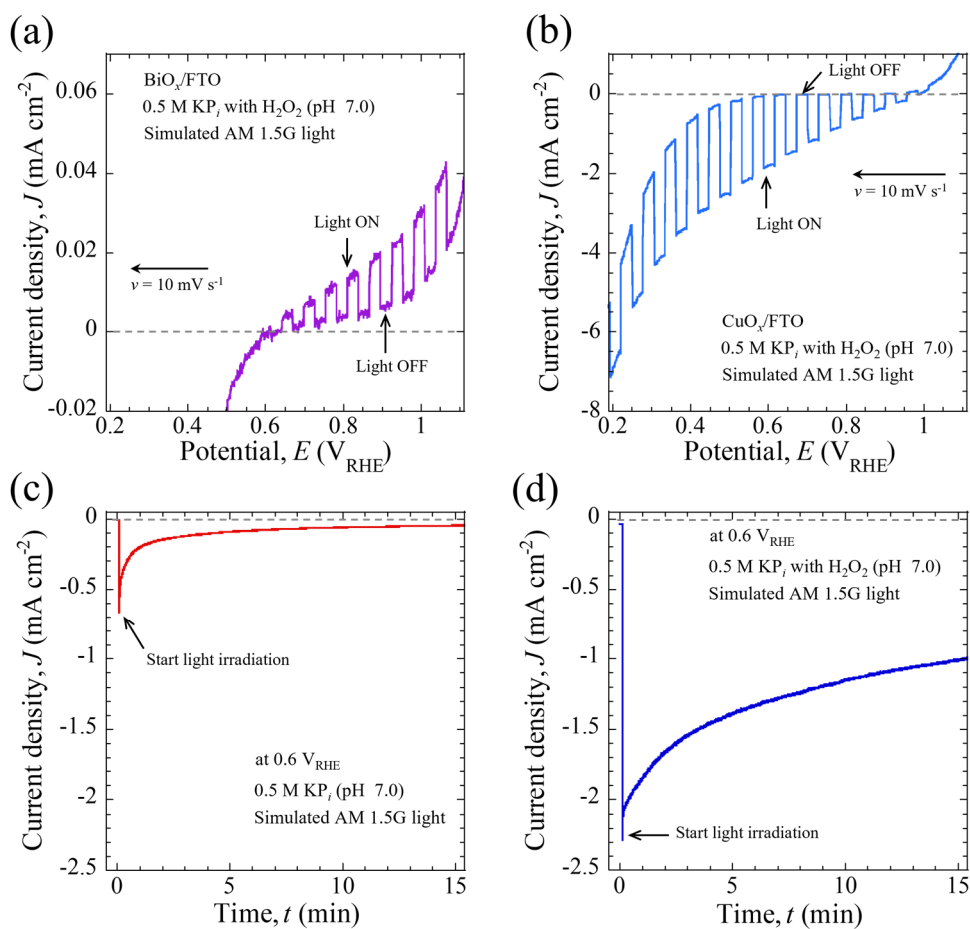

Figure S14. The PEC properties of BiO<sub>x</sub>/FTO and CuO<sub>x</sub>/FTO photoelectrodes.  $J$ - $E$  and  $J$ - $t$  curves for the BiO<sub>x</sub>/FTO (a) and the CuO<sub>x</sub>/FTO (b-d) photoelectrodes prepared via spray pyrolysis method at temperature of 400 °C using a dilute aqueous nitric acid precursor solution containing Bi(NO<sub>3</sub>)<sub>3</sub> or Cu(NO<sub>3</sub>)<sub>2</sub>. The  $J$ - $E$  curves were acquired in the 0.5 M KP<sub>i</sub> buffered aqueous solution with 0.1 M H<sub>2</sub>O<sub>2</sub> sacrificial reagent (pH = 7.0) under chopped AM 1.5G solar illumination with a potential sweep rate ( $v$ ) of 10 mV s<sup>-1</sup>. The  $J$ - $t$  curves recorded at a constant  $E$  of 0.6 V<sub>RHE</sub> were obtained in the 0.5 M KP<sub>i</sub> aqueous solution without (c) and with (d) 0.1 M H<sub>2</sub>O<sub>2</sub> sacrificial reagent.

Table S6. Summary of the stability test for CBO and CuO<sub>x</sub> at constant  $E$  of 0.6 V<sub>RHE</sub>.\*

|                  | Electrolyte**                                         | $J_{t=1 \text{ min}}$<br>(mA cm <sup>-2</sup> ) | $J_{t=15 \text{ min}}$<br>(mA cm <sup>-2</sup> ) | $J_{t=15 \text{ min}} / J_{t=1 \text{ min}}$ |
|------------------|-------------------------------------------------------|-------------------------------------------------|--------------------------------------------------|----------------------------------------------|
| CBO              | 0.5 M KP <sub>i</sub>                                 | -0.19                                           | -0.13                                            | 0.68                                         |
|                  | 0.5 M KP <sub>i</sub> + H <sub>2</sub> O <sub>2</sub> | -0.94                                           | -0.72                                            | 0.77                                         |
| CuO <sub>x</sub> | 0.5 M KP <sub>i</sub>                                 | -0.18                                           | -0.04                                            | 0.22                                         |
|                  | 0.5 M KP <sub>i</sub> + H <sub>2</sub> O <sub>2</sub> | -1.85                                           | -0.98                                            | 0.53                                         |

\*The light source was simulated sunlight (AM 1.5G, 100 mW cm<sup>-2</sup>).

\*\*The electrolyte pH of potassium phosphate (KP<sub>i</sub>) was adjusted to 7.0 by mixing of K<sub>2</sub>HPO<sub>4</sub> and K<sub>2</sub>HPO<sub>4</sub>. The sacrificial reagent of H<sub>2</sub>O<sub>2</sub> (0.1 M) was added to the KP<sub>i</sub> buffered aqueous solution.

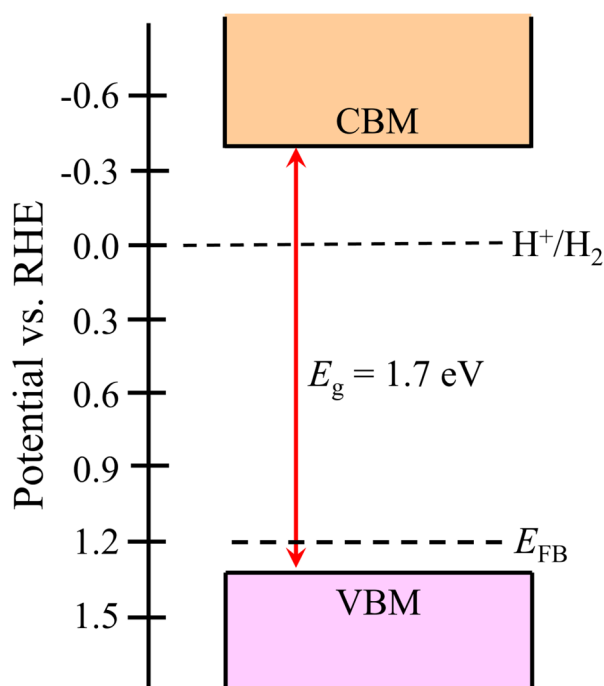

Figure S15. Schematic depiction of energy level diagram of p-type CBO. The diagram was based on the bandgap energy ( $E_g$ ) of 1.7 eV and the flatband potential ( $E_{FB}$ ) of 1.2 V<sub>RHE</sub> delivered from the analysis of the Tacu plot (Fig. 5) and MS plot (Fig. S12).



## References

- [1] H. S. Park *et al.*, *Phys. Chem. Chem. Phys.*, **2014**, *16*, 22462- 22465.
- [2] D. Cao *et al.*, *J. Mater. Chem. A.*, **2016**, *4*, 8995-9001.
- [3] D. Kang *et al.*, *Chem. Mater.*, **2016**, *28*, 4331-4340.
- [4] S. P. Berglund *et al.*, *Chem. Mater.*, **2016**, *28*, 4231-4242.
- [5] N. T. Hahn *et al.*, *J. Phys. Chem. C*, **2012**, *116*, 6459-6466.
- [6] Y. Nakabayashi *et al.*, *Electrochim. Acta*, **2014**, *125*, 191-198.
- [7] S. Pulipaka *et al.*, *J. Catal.*, **2020**, *387*, 17-27.
- [8] N. Xu *et al.*, *Int. J. Hydrog. Energy*, **2018**, *4*, 2064-2072.
- [9] M. Nishikawa *et al.*, *Mat. Sci. Semicond. Proc.*, **2017**, *57*, 12-17.
- [10] K. Varunkumar *et al.*, *Mater. Chem. Phys.*, **2021**, *261*, 124245.
- [11] X. Yuan *et al.*, *Polymers*, **2021**, *13*, 3341.
- [12] B. Meena *et al.*, *Energy Fuels*, **2023**, *37*, 14280-14289.
- [13] X. Zhu *et al.*, *Chinese J. Catal.*, **2018**, *39*, 1704-1710.
- [14] J. Li *et al.*, *Chem. Commun.*, **2018**, *54*, 3331-3334.
- [15] F. Wang *et al.*, *J. Mater. Chem. A.*, **2017**, *5*, 12838.
- [16] F. Wang *et al.*, *J. Am. Chem. Soc.*, **2017**, *139*, 15094.
- [17] A. Song *et al.*, *ACS Appl. Mater. Interfaces*, **2020**, *12*, 13959.
- [18] A. Song *et al.*, *Chem. Sci.*, **2020**, *11*, 11195.
- [19] Y. Wang *et al.*, *Int. J. Hydrog. Energy*, **2022**, *47*, 37774.
- [20] C. G. O. Bruziquesi *et al.*, *Int. J. Hydrog. Energy*, **2023**, *48*, 3456.
